# Supplementary material for: Predicting the Glycemic Index of Biscuits Using Static In Vitro Digestion Protocols
Source: MDPI journal article supplement (doi:10.3390/foods12020404), 2023-01-14
Supplement: s1 [file s1]

Supplementary material

**Table S1.** Chemical compositions, and the GI and GL values of biscuits samples.

| Sample ID | GI values | GL values | Moisture content <sup>1</sup> | Protein content <sup>2</sup> | Fat content <sup>2</sup> | Total carbohydrates     | Total starch (% db) <sup>1</sup> |
|-----------|-----------|-----------|-------------------------------|------------------------------|--------------------------|-------------------------|----------------------------------|
| 9         | 52        | 35.36     | 4.20±0.52 <sup>a</sup>        | 7.50±1.18 <sup>c</sup>       | 15.30±2.74 <sup>ab</sup> | 68.15±4.24 <sup>a</sup> | 34.76±2.45 <sup>a</sup>          |
| 10        | 53        | 33.93     | 3.70±0.48 <sup>b</sup>        | 7.21±1.31 <sup>c</sup>       | 17.24±1.98 <sup>a</sup>  | 64.52±3.59 <sup>a</sup> | 39.03±0.57 <sup>a</sup>          |
| 11        | 44        | 29.04     | 4.12±0.74 <sup>a</sup>        | 7.80±1.25 <sup>c</sup>       | 14.51±1.81 <sup>b</sup>  | 66.11±4.07 <sup>a</sup> | 29.33±3.79 <sup>b</sup>          |
| 12        | 30        | 10.2      | 3.97±0.19 <sup>ab</sup>       | 29.55±2.35 <sup>b</sup>      | 8.83±1.14 <sup>c</sup>   | 34.12±3.67 <sup>b</sup> | 17.13±1.82 <sup>c</sup>          |
| 13        | 28        | 8.57      | 2.15±0.39 <sup>d</sup>        | 32.17±1.93 <sup>a</sup>      | 11.39±1.52 <sup>c</sup>  | 30.67±2.98 <sup>b</sup> | 14.32±1.57 <sup>c</sup>          |
| 14        | 19        | 6.27      | 3.56±0.81 <sup>c</sup>        | 27.64±1.72 <sup>b</sup>      | 10.80±1.77 <sup>c</sup>  | 33.04±4.52 <sup>b</sup> | 15.65±2.73 <sup>c</sup>          |

<sup>1</sup> Data was based on triplicate measurements, <sup>2</sup> data was based on duplicate measurements. Values with different letters in the same column are significantly different at  $p < 0.05$ .

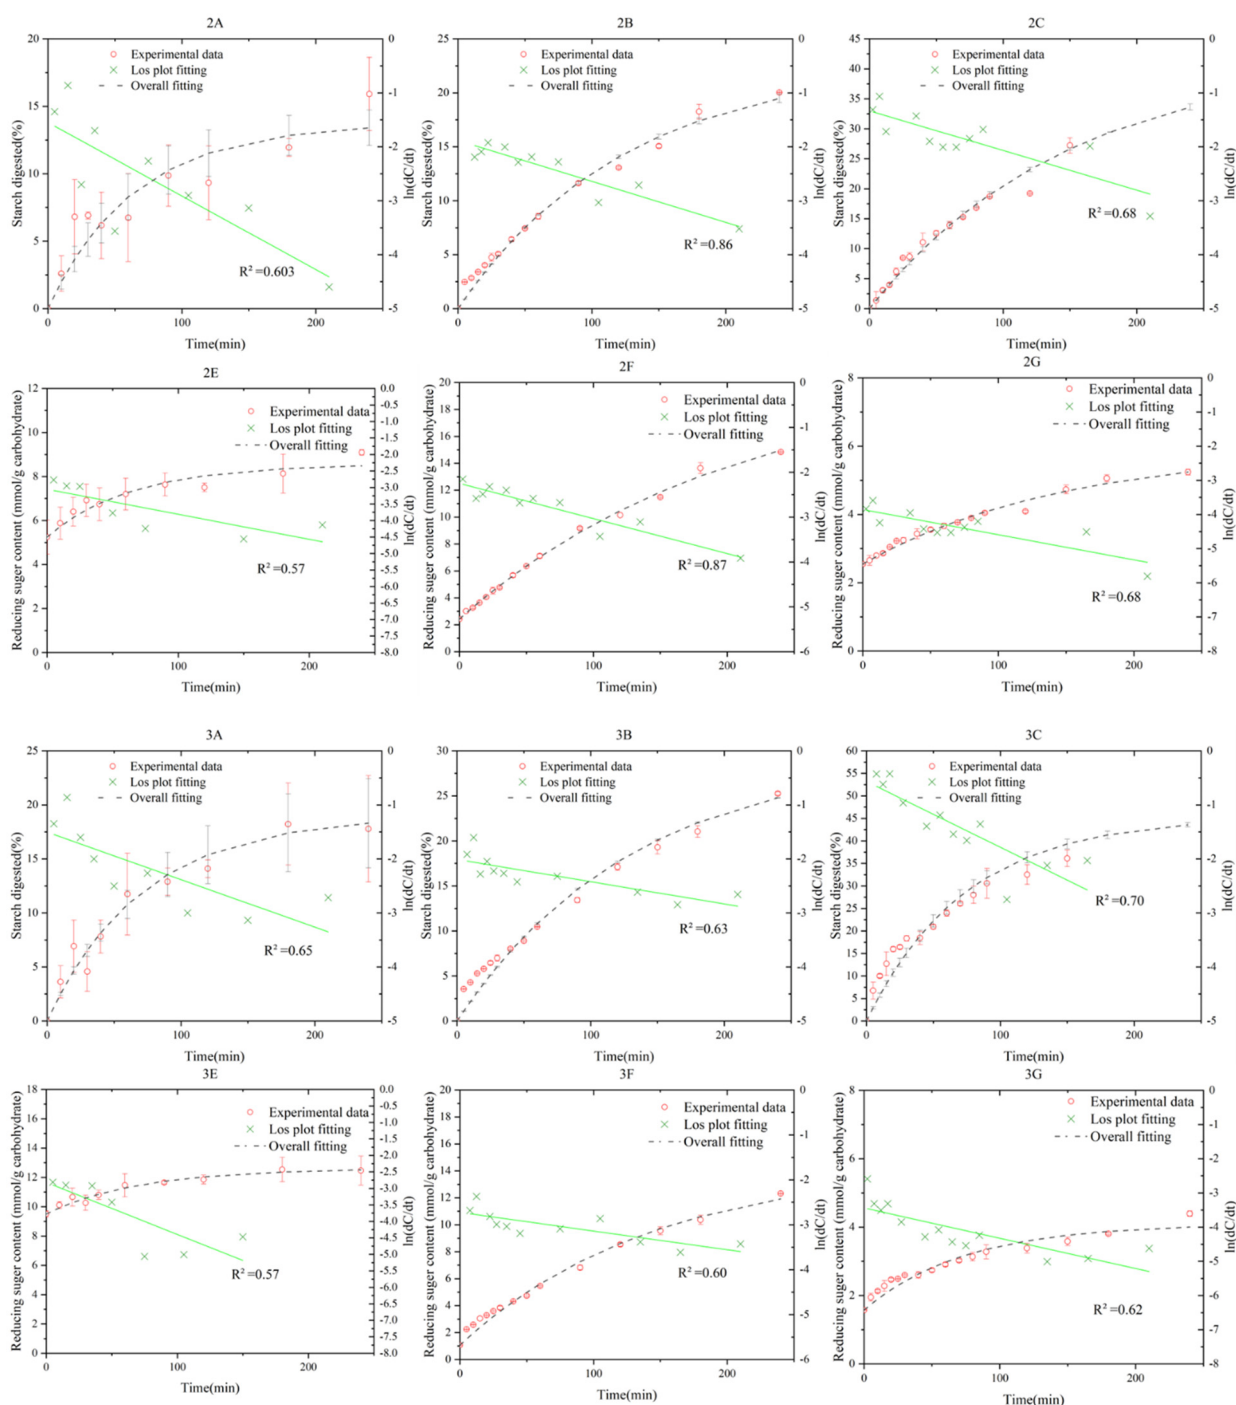

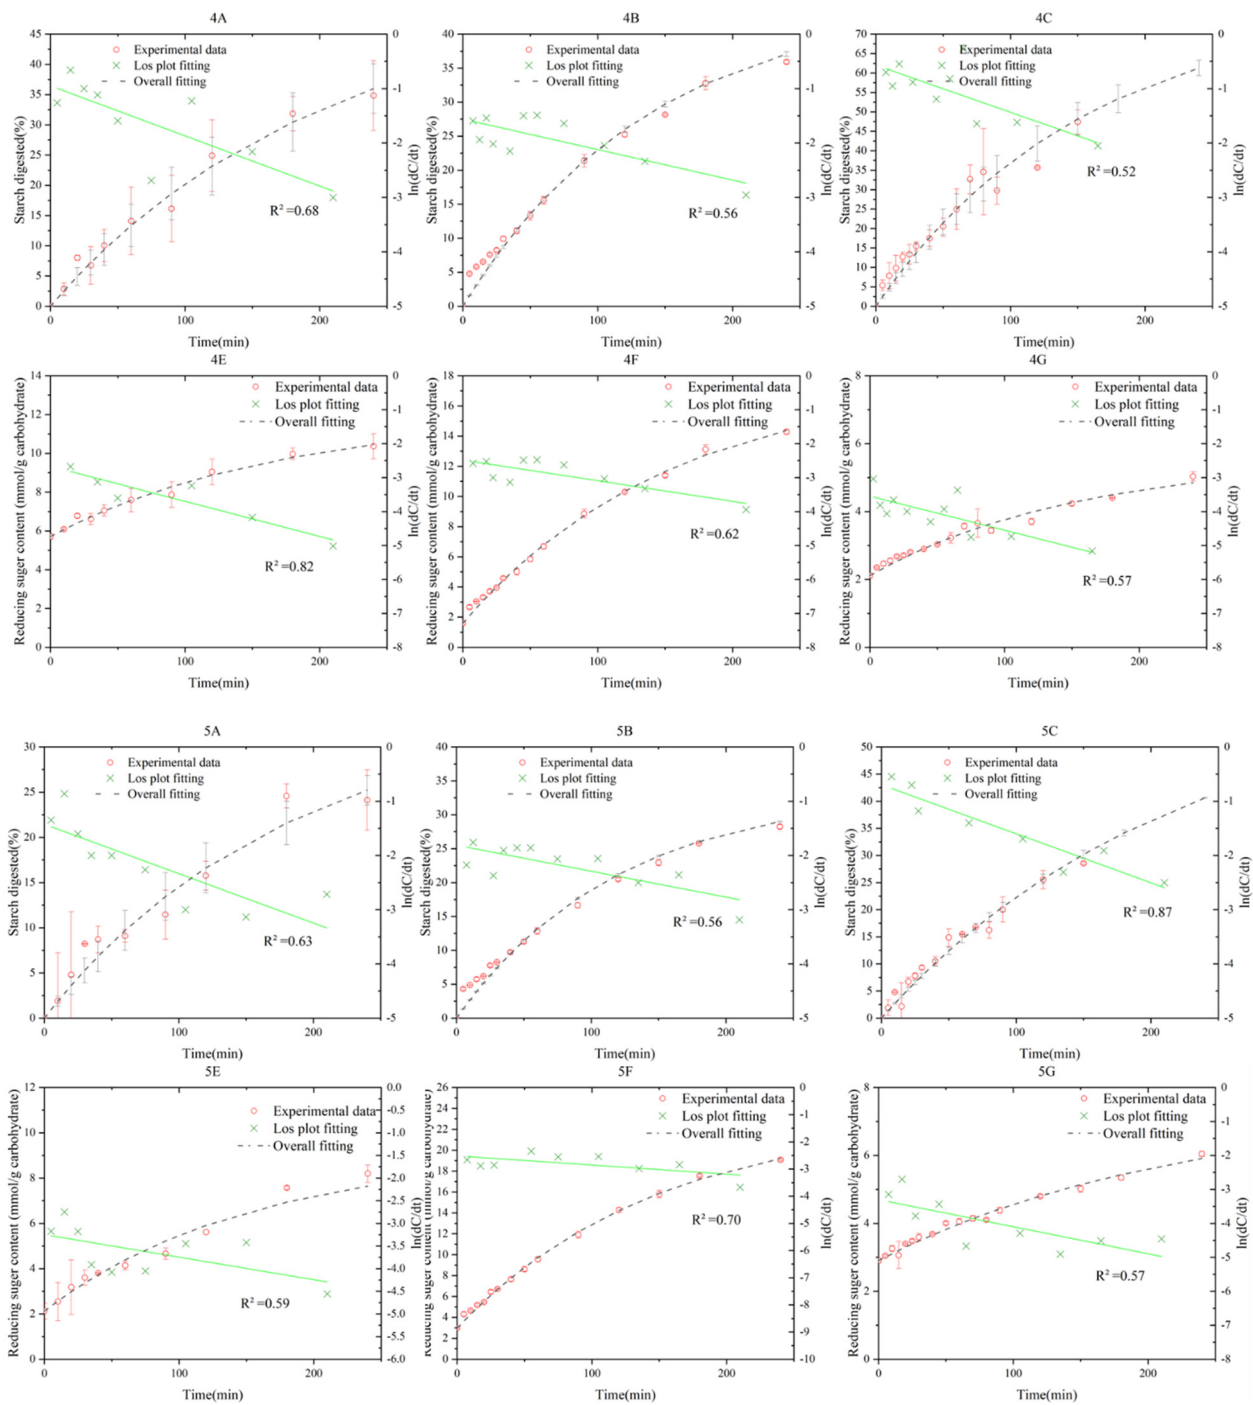

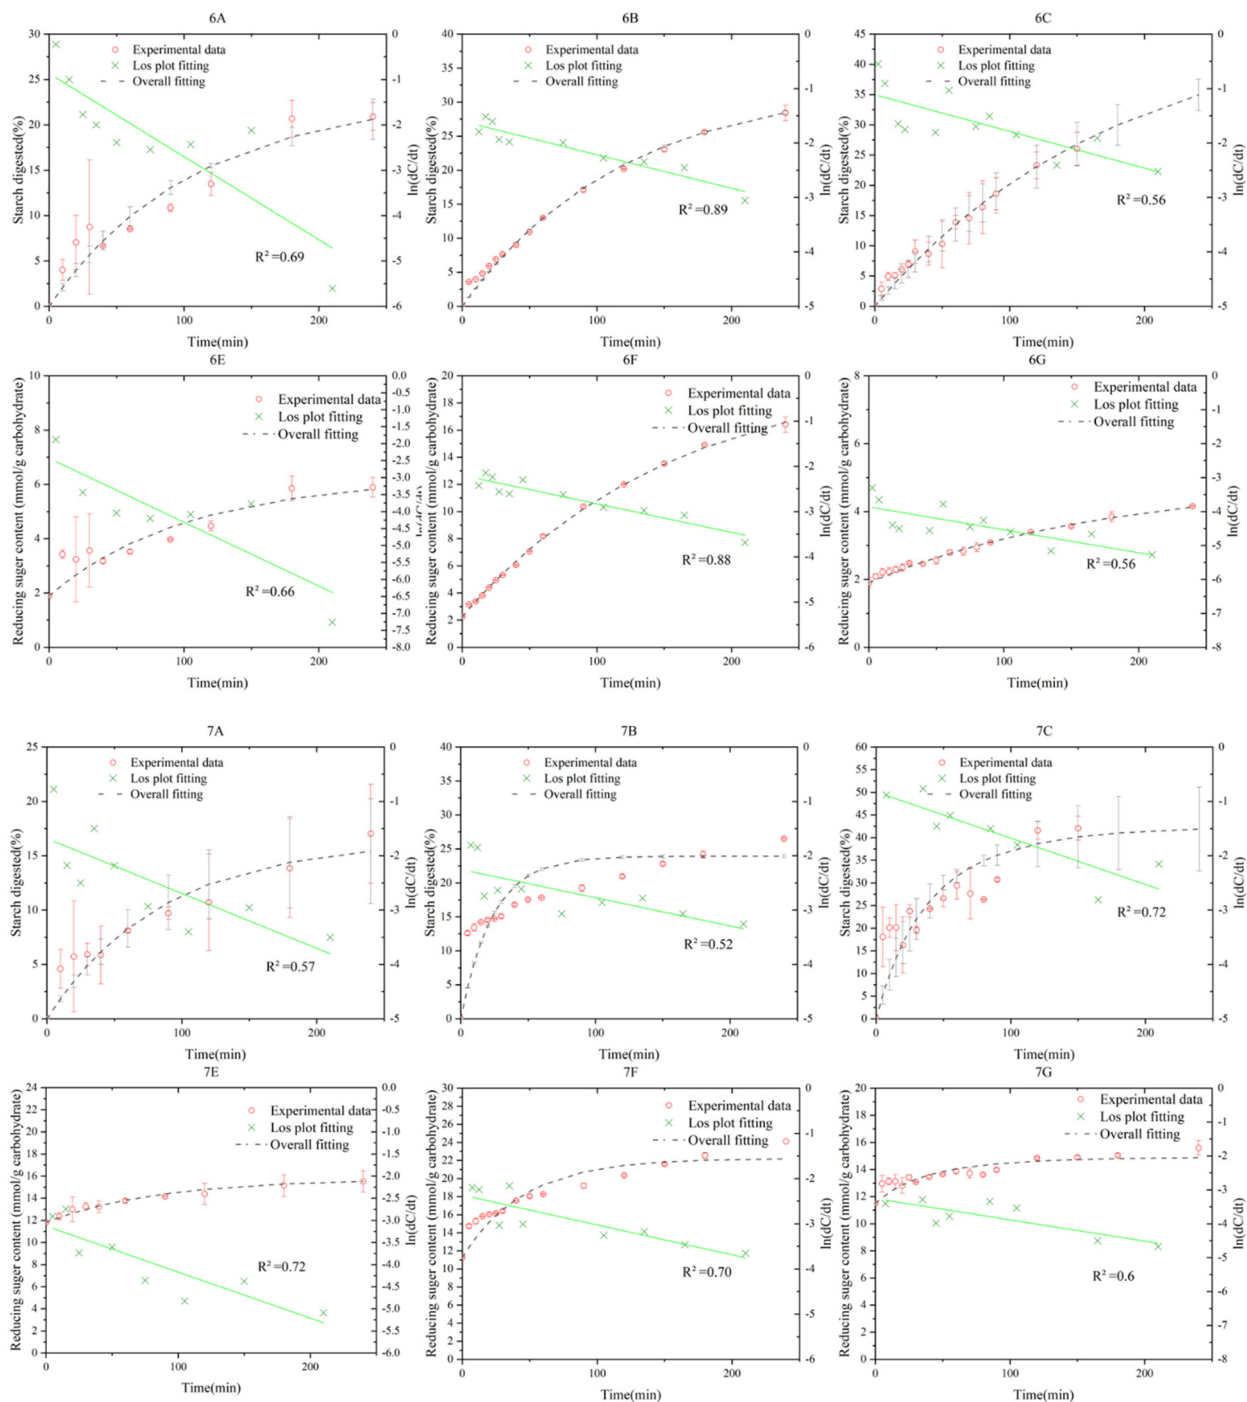

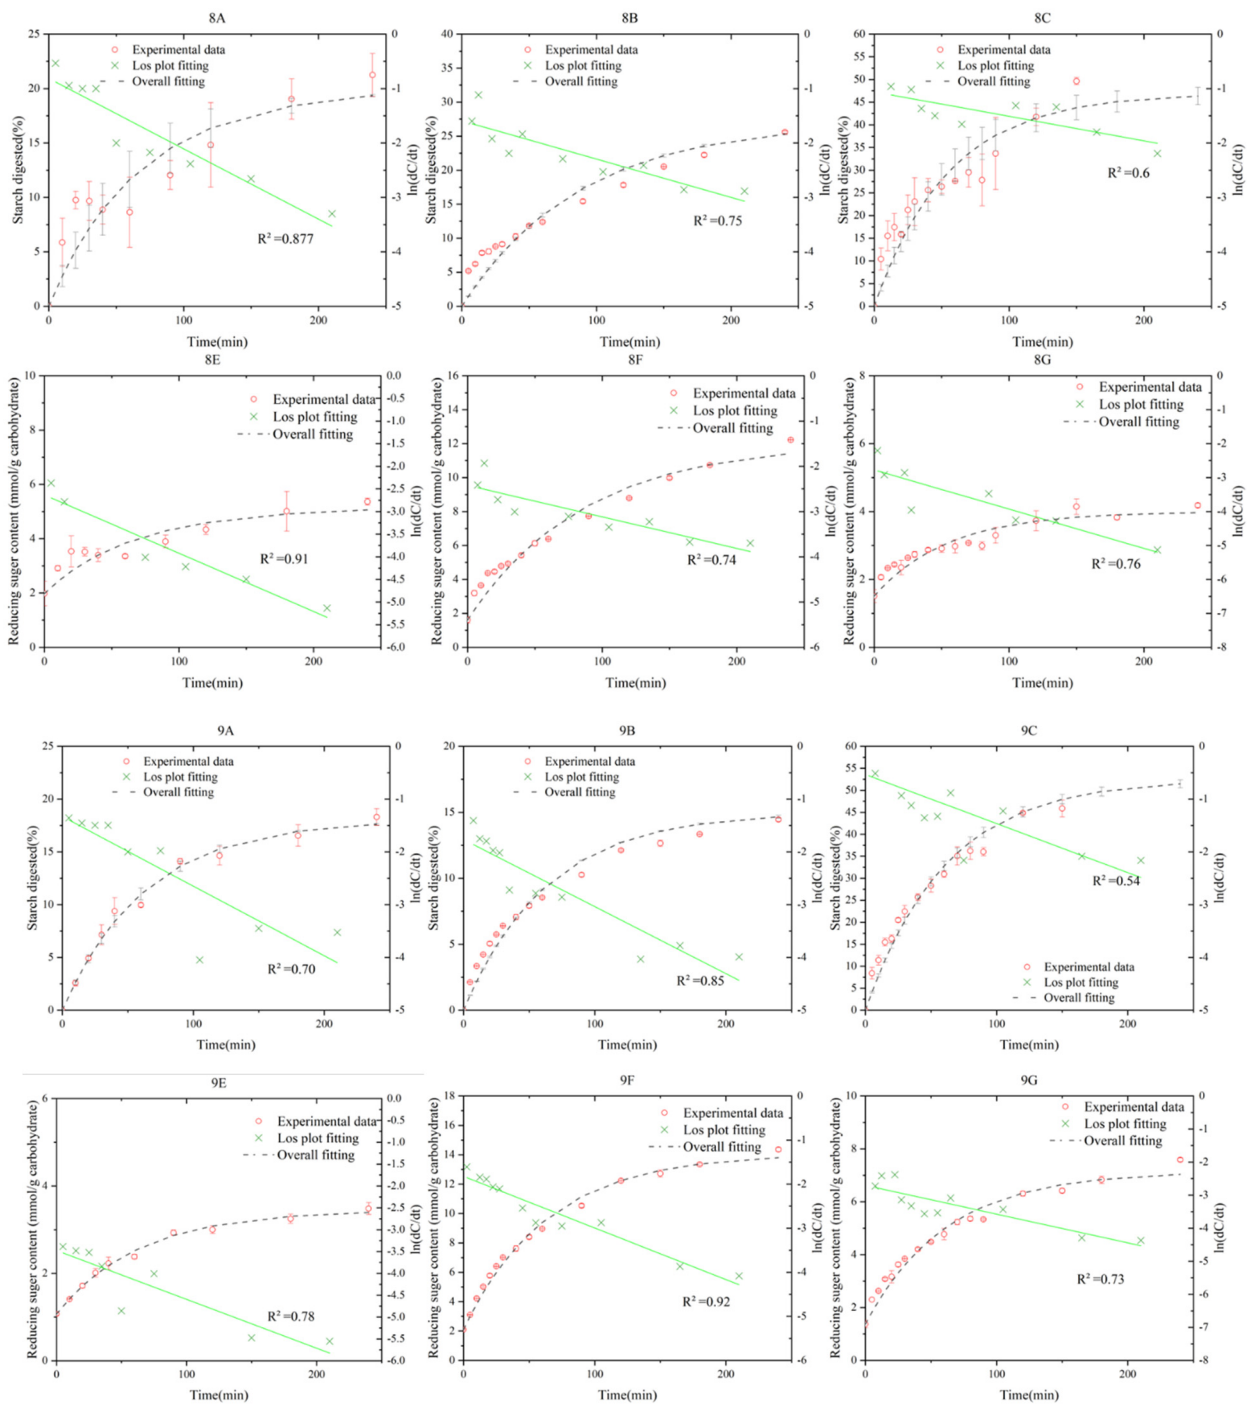

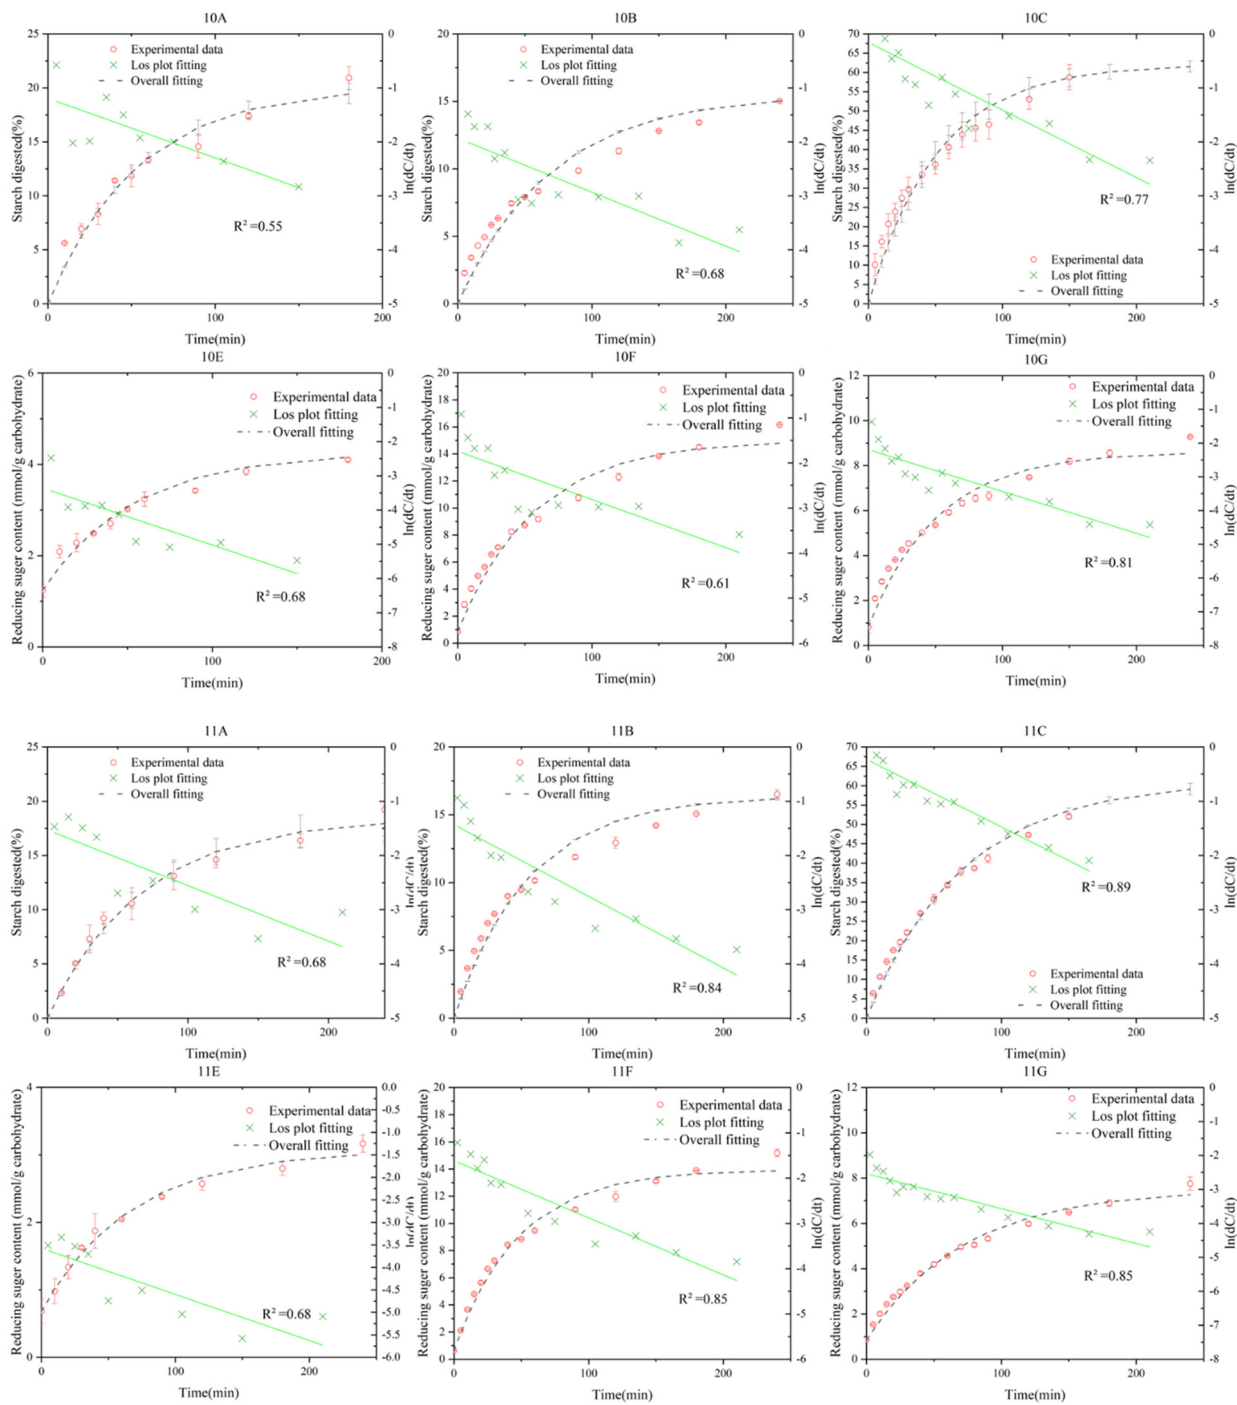



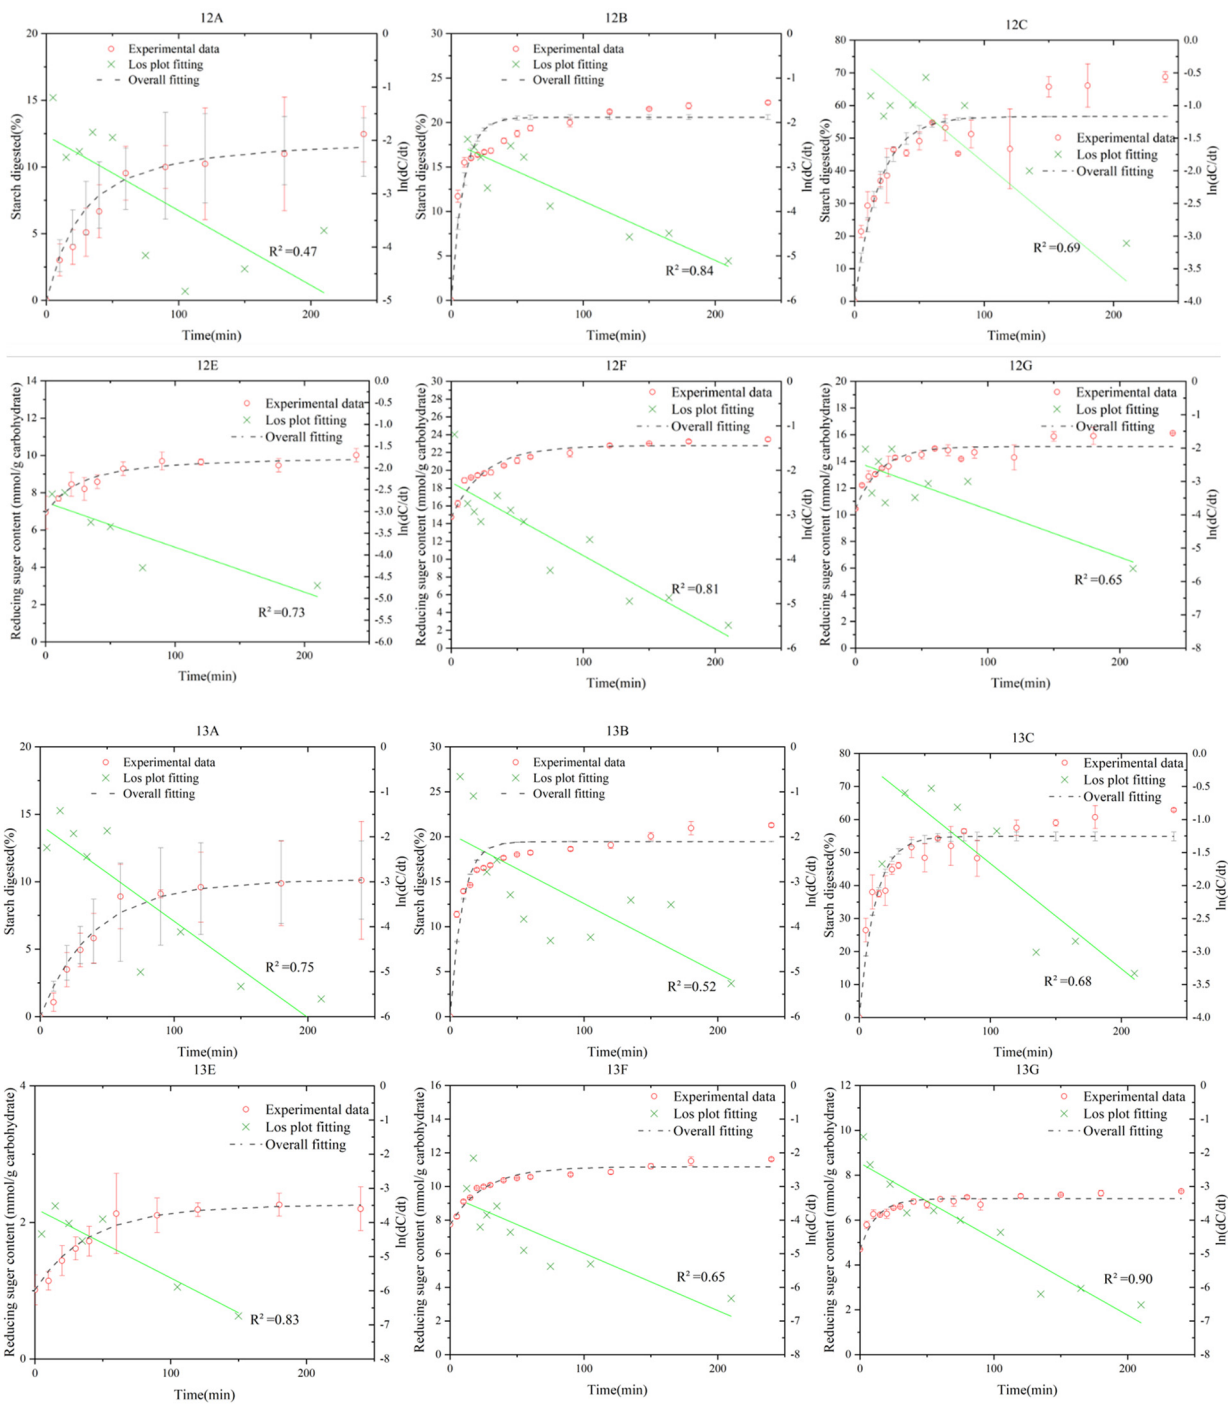

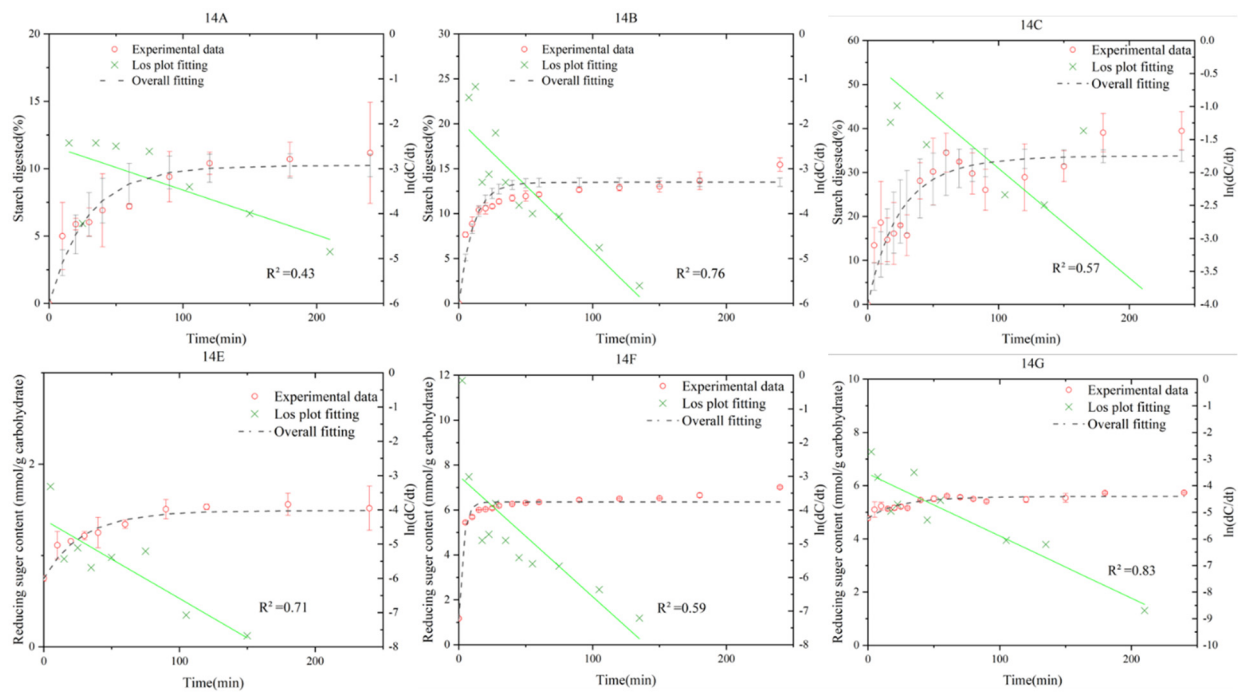

**Figure S1.** LOS plot for all samples (2-14) when digested using the INFOGEST protocol (A) and the single enzyme digestion model using porcine pancreatin (B) or pure  $\alpha$ -amylase (C), showing only one digestion phase. The upper pane (A, B & C) was the fitting results in terms of the digestion results of starch digested (%) as a function of the digestion time (min), while the lower pane (E, F & G) was the fitting results in terms of the digestion results of the total amount of released reducing sugar content (mmol) normalized to the total carbohydrates as a function of the digestion time (min).

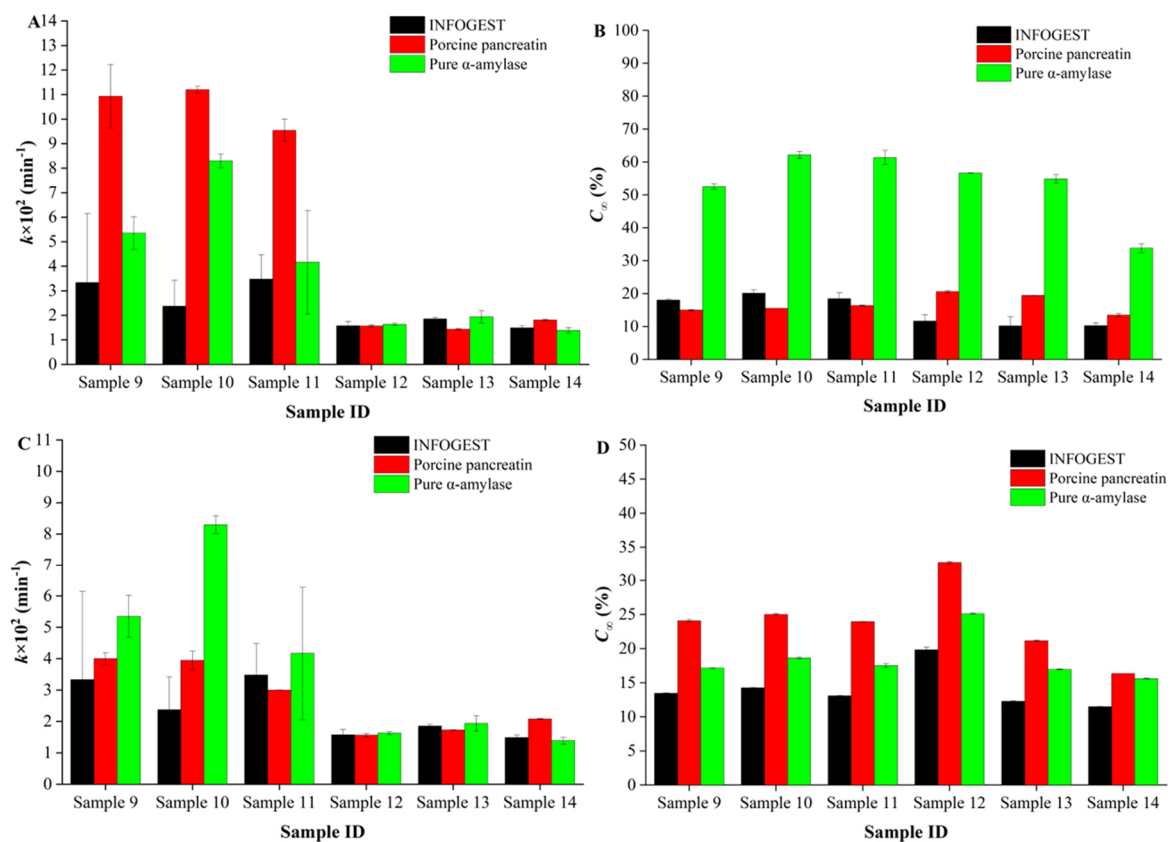

**Figure S2.** The parameters of samples 9-12 were obtained by fitting the in vitro digestion diagram with a single first-order kinetics (SK) model. (A) and (B) are the fitting results of the total percentage of starch digested, (C) and (D) are the fitting results of the reducing sugar content which has been normalized to the total weight of carbohydrate. Data was based on duplicate measurements.
